# Supplementary material
Source: PubMed Central journal article supplement (PMC5010025)
Supplement: NIHMS782612-supplement-1.pdf [file NIHMS782612-supplement-1.pdf]

**Supplementary Table 2:** Fields of the MicrobeJ data structure containing particle properties or complementary information based on user-selected options. Each field can be accessed using an intuitive object-oriented semantic.

| Properties                 | Description                                                                                                                                                                                        |
|----------------------------|----------------------------------------------------------------------------------------------------------------------------------------------------------------------------------------------------|
| <b>NAME</b> [name]         |                                                                                                                                                                                                    |
| . id                       | The unique Id of the particle                                                                                                                                                                      |
| . name                     | The name of the particle                                                                                                                                                                           |
| <b>SHAPE</b> [morphology]  |                                                                                                                                                                                                    |
| . angularity [mean]        |                                                                                                                                                                                                    |
| . mean                     | The mean value of the angularity (defined as the local angle) values measured along the medial axis of the particle                                                                                |
| . max                      | The max value of the angularity values used to generate the mean angularity                                                                                                                        |
| . min                      | The min value of the angularity values used to generate the mean angularity                                                                                                                        |
| . median                   | The median value of the angularity values used to generate the mean angularity                                                                                                                     |
| . mid                      | The angularity value measured at the center of the medial axis                                                                                                                                     |
| . stdev                    | The standard deviation of the angularity values used to generate the mean angularity                                                                                                               |
| . variation                | The ratio of the standard deviation and the mean value of the angularity                                                                                                                           |
| . area                     | The area of the particle in square pixels or in calibrated square units                                                                                                                            |
| . aspectRatio              | The aspect ratio of the particle's fitted ellipse (see ImageJ Documentation for more details)                                                                                                      |
| . circularity              | $4\pi \times \text{area} / \text{perimeter}^2$ with a value of 1.0 indicating a perfect circle (see ImageJ Documentation for more details)                                                         |
| . curvature                | The curvature (defined as the reciprocal of the radius of curvature) measured between the end points and the center of the medial axis                                                             |
| . feret [max]              |                                                                                                                                                                                                    |
| . max                      | The longest distance between any two points along the particle boundary, also known as maximum caliper                                                                                             |
| . min                      | The minimum caliper diameter                                                                                                                                                                       |
| . length                   | The length of the medial axis of the particle in pixels or in calibrated units                                                                                                                     |
| . morphology               | The morphology index the particle is associated to                                                                                                                                                 |
| . perimeter                | The length in pixels or in calibrated square units of the outside boundary of the particle                                                                                                         |
| . roundness                | $4 \times \text{area} / (\pi \times \text{major axis}^2)$ or the inverse of aspect ratio (see ImageJ Documentation for more details)                                                               |
| . sinuosity                | The ratio of the curvilinear length (along the medial axis) and the distance (straight line) between the end points of the medial axis                                                             |
| . solidity                 | area / convex area (see ImageJ Documentation for more details)                                                                                                                                     |
| . width [mean]             |                                                                                                                                                                                                    |
| . mean                     | The mean value of the width in pixels or in calibrated units along the medial axis of the particle                                                                                                 |
| . max                      | The max value of the width values used to generate the mean width                                                                                                                                  |
| . min                      | The min value of the width values used to generate the mean width                                                                                                                                  |
| . median                   | The median value of the width values used to generate the mean width                                                                                                                               |
| . mid                      | The width value measured at the center of the medial axis                                                                                                                                          |
| . stdev                    | The standard deviation of the width values used to generate the mean width                                                                                                                         |
| . variation                | The ratio of the standard deviation and the mean value of the width                                                                                                                                |
| <b>LOCATION</b> [(x;y)]    |                                                                                                                                                                                                    |
| . x                        | The x coordinate of the particle center, expressed in pixels or in calibrated units.                                                                                                               |
| . y                        | The y coordinate of the particle center, expressed in pixels or in calibrated units.                                                                                                               |
| <b>EXPERIMENT</b>          |                                                                                                                                                                                                    |
| . name                     | The name of the experiment                                                                                                                                                                         |
| . description              | The description of the experiment                                                                                                                                                                  |
| . fullName                 | The name and the description of the experiment                                                                                                                                                     |
| . date                     | The date when the experiment was analyzed                                                                                                                                                          |
| . id                       | The unique Id of the experiment                                                                                                                                                                    |
| . field                    | The field of the image used to analyze the experiment                                                                                                                                              |
| . series                   | The series of images used to analyze the experiment                                                                                                                                                |
| <b>IMAGE</b> [label]       |                                                                                                                                                                                                    |
| . name                     | The name the image                                                                                                                                                                                 |
| . label                    | The label of the frame on which the particle was detected                                                                                                                                          |
| . meta                     | The metadata of the frame on which the particle was detected                                                                                                                                       |
| . background               |                                                                                                                                                                                                    |
| . chX [mean]               | The statistics of the gray values within the particle boundary measured on channel X in the stack or hyperstack                                                                                    |
| . count                    | The number of pixels within the particle boundary                                                                                                                                                  |
| . dmode                    | Most frequently occurring gray value within the particle boundary. Corresponds to the highest peak in the histogram (see ImageJ Documentation for more details)                                    |
| . kurtosis                 | The fourth order moment about the mean                                                                                                                                                             |
| . max                      | Maximum gray value within the particle boundary                                                                                                                                                    |
| . mean                     | Average gray value within the particle boundary. This is the sum of the gray values of all the pixels in the selection divided by the number of pixels (see ImageJ Documentation for more details) |
| . median                   | Median gray value within the particle boundary                                                                                                                                                     |
| . min                      | Minimum gray value within the particle boundary                                                                                                                                                    |
| . skewness                 | The third order moment about the mean (see ImageJ Documentation for more details)                                                                                                                  |
| . stdev                    | Standard deviation of the gray values used to generate the mean gray value                                                                                                                         |
| <b>POSITION</b> [position] |                                                                                                                                                                                                    |
| . position                 | The position (slice or frame) of the particle in the hyperstack                                                                                                                                    |
| . slice                    | The slice position of the particle in the hyperstack                                                                                                                                               |
| . frame                    | The frame position of the particle in the hyperstack                                                                                                                                               |
| . channel                  | The channel position of the particle in the hyperstack                                                                                                                                             |
| <b>INTENSITY</b>           | The average gray value measured on the channel used to detect the particle                                                                                                                         |
| . chX [mean]               | The statistics of the gray values within the particle boundary measured on the channel X in the stack or hyperstack                                                                                |
| . count                    | The number of pixels within the particle boundary                                                                                                                                                  |
| . dmode                    | Most frequently occurring gray value within the particle boundary. Corresponds to the highest peak in the histogram (see ImageJ Documentation for more details)                                    |
| . kurtosis                 | The fourth order moment about the mean                                                                                                                                                             |
| . max                      | Maximum gray value within the particle boundary                                                                                                                                                    |
| . mean                     | Average gray value within the particle boundary. This is the sum of the gray values of all the pixels in the selection divided by the number of pixels (see ImageJ Documentation for more details) |
| . mean_c                   | The corrected average gray value ( $\text{mean}_c = (\mu_{\text{particle}} - \mu_{\text{background}})$ )                                                                                           |
| . median                   | Median gray value within the particle boundary                                                                                                                                                     |
| . min                      | Minimum gray value within the particle boundary                                                                                                                                                    |
| . skewness                 | The third order moment about the mean (see ImageJ Documentation for more details)                                                                                                                  |
| . signal                   | Is true [1] when the unsigned sigma distance ( $z =  (\mu_{\text{particle}} - \mu_{\text{background}}) / \sigma_{\text{background}} $ ) is higher than the user-defined value of z                 |

|                         |                                                                                                                                                       |
|-------------------------|-------------------------------------------------------------------------------------------------------------------------------------------------------|
| . snr                   | The signal-to-noise ratio between the average gray value within the particle boundary and the average gray value of the background                    |
| . sum                   | The sum of the gray values within the particle boundary                                                                                               |
| . stdev                 | Standard deviation of the gray values used to generate the mean gray value                                                                            |
| <b>MAXIMA</b> [count]   | The properties of the associations with all the maxima                                                                                                |
| . betwixt               | The number of maxima localized neither at one of the poles nor at the midcell region of the particle (see the Association section for more details)   |
| . bipolar               | Is true [1] when the particle is associated with at least two maxima localized at two different poles                                                 |
| . connected             | Is true [1] when the particle is associated with at least one maximum associated with at least one other particle                                     |
| . count                 | The total number of associated maxima.                                                                                                                |
| . midcell               | The number of maxima localized at the midcell region (see the Association section for more details)                                                   |
| . polar                 | The number of maxima localized at one of the poles (see the Association section for more details)                                                     |
| . pole [X]              | The number of maxima localized at the specified pole (see the Orientation section to see how to define poles indexes)                                 |
| . type                  | The type of the association : none / unipolar / bipolar                                                                                               |
| . undefined             | The number of maxima with an undefined localization                                                                                                   |
| . unipolar              | Is true [1] when the particle is associated with at least two maxima localized at the same pole                                                       |
| . distance [mean]       |                                                                                                                                                       |
| . . mean                | The mean value of the distance in pixels or in calibrated units between the associated maxima                                                         |
| . . max                 | The maximum value of the distance values                                                                                                              |
| . . min                 | The minimum value of the distance values                                                                                                              |
| . . median              | The median value of the distance values                                                                                                               |
| . . stdev               | The standard deviation value of the distance values                                                                                                   |
| . . variation           | The ratio of the standard deviation and the mean value                                                                                                |
| . X [count]             | The properties of the associations with the maxima detected using the settings defined at the index X                                                 |
| <b>FEATURE</b> [count]  | The properties of the associations with all the features                                                                                              |
| . betwixt               | The number of features localized neither at one of the poles nor at the midcell region of the particle (see the Association section for more details) |
| . bipolar               | Is true [1] when the particle is associated with at least two features localized at two different poles                                               |
| . connected             | Is true [1] when the particle is associated with at least one feature associated with at least one other particle                                     |
| . count                 | The total number of associated features                                                                                                               |
| . midcell               | The number of feature localized at the midcell region (see the Association section for more details)                                                  |
| . polar                 | The number of feature localized at one of the poles (see the Association section for more details)                                                    |
| . pole [X]              | The number of feature localized at the specified pole (see the Orientation section to see how to define poles indexes)                                |
| . type                  | The type of the association : none / unipolar / bipolar                                                                                               |
| . undefined             | The number of feature with an undefined localization                                                                                                  |
| . unipolar              | Is true [1] when the particle is associated with at least two features localized at the same pole                                                     |
| . distance [mean]       |                                                                                                                                                       |
| . . mean                | The mean value of the distance in pixels or in calibrated units between the associated features                                                       |
| . . max                 | The maximum value of the distance values                                                                                                              |
| . . min                 | The minimum value of the distance values                                                                                                              |
| . . median              | The median value of the distance values                                                                                                               |
| . . stdev               | The standard deviation value of the distance values                                                                                                   |
| . . variation           | The ratio of the standard deviation and the mean value                                                                                                |
| . X [count]             | The properties of the associations with the features detected using the settings defined at the index X                                               |
| <b>PARENT</b> [name]    | The properties of the association with the parent particle (i.e. Bacteria) (see the Association section for more details)                             |
| . id                    | The unique Id of the parent particle                                                                                                                  |
| . name                  | The name of the parent particle                                                                                                                       |
| . location              |                                                                                                                                                       |
| . . cartesian [x;y]     |                                                                                                                                                       |
| . . . x                 | The relative X-coordinate of the particle using the cartesian coordinate system                                                                       |
| . . . y                 | The relative Y-coordinate of the particle using the cartesian coordinate system                                                                       |
| . . orthogonal [x;y;z]  |                                                                                                                                                       |
| . . . x                 | The relative X-coordinate of the particle using the orthogonal coordinate system                                                                      |
| . . . y                 | The relative Y-coordinate of the particle using the orthogonal coordinate system                                                                      |
| . . . z                 | The relative Z-coordinate of the particle using the orthogonal coordinate system                                                                      |
| . . normalized [x;y;z]  |                                                                                                                                                       |
| . . . x                 | The relative X-coordinate of the particle using the normalized orthogonal coordinate system                                                           |
| . . . y                 | The relative Y-coordinate of the particle using the normalized orthogonal coordinate system                                                           |
| . . . z                 | The relative Z-coordinate of the particle using the normalized orthogonal coordinate system                                                           |
| . . cylindrical [θ;r;p] |                                                                                                                                                       |
| . . . theta             | The angular position θ of the particle using a polar coordinate system $[-\pi/2, \pi/2]$                                                              |
| . . . p                 | The longitudinal position p of the particle using a polar coordinate system $[-1, 1]$                                                                 |
| . . . r                 | The radial coordinate r of the particle using the cylindrical coordinate system $[-1, 1]$                                                             |
| . . . b                 | The revolution angle β of the particle using a polar coordinate system $[0, 2\pi]$                                                                    |
| . . . l                 | The arc length L of the particle using a polar coordinate system.                                                                                     |
| . . . phi               | The elevation angle φ of the particle using a polar coordinate system $[-\pi/2, \pi/2]$                                                               |
| . distance              |                                                                                                                                                       |
| . . center              | The distance in pixels or in calibrated units between the orthogonal projection of the particle center and the center of the parent particle          |
| . . pole1               | The distance in pixels or in calibrated units between the orthogonal projection of the particle center and the tip of the pole 1                      |
| . . pole2               | The distance in pixels or in calibrated units between the orthogonal projection of the particle center and the tip of the pole 2                      |
| . . side                | The distance in pixels or in calibrated units between the particle center and the closest side of the parent particle                                 |
| . . axis                | The distance in pixels or in calibrated units between the particle center and its orthogonal projection on the medial axis of the parent particle     |
| . . linker              | The distance in pixels or in calibrated units between the particle center and the point of reference on the parent particle                           |
| . localization [title]  |                                                                                                                                                       |
| . . title               | The localization of the particle inside the parent particle ('polar','midcell','betwixt','undefined')                                                 |
| . . index               | The index of the localization of the particle inside the parent particle (polar:0,midcell:1,betwixt:2,undefined:3)                                    |
| . . side                | Is true [1] when the particle is located close to the sides of the parent particle (location.norm.y>=0.5)                                             |
| . . axis                | Is true [1] when the particle is located close to the medial axis of the parent particle (location.norm.y<0.5)                                        |
| . . inside              | Is true [1] when the particle is located inside the parent particle                                                                                   |
| . . outside             | Is true [1] when the particle is located outside the parent particle                                                                                  |
| . . branch              | The index of the branch that the particle is associated with                                                                                          |
| . . pole                | The index of the pole that the particle is associated with                                                                                            |
| . . midcell             | Is true [1] when the particle localization is 'midcell'                                                                                               |

|                        |                                                                                                |
|------------------------|------------------------------------------------------------------------------------------------|
| . polar                | Is true [1] when the particle localization is 'polar'                                          |
| . betwixt              | Is true [1] when the particle localization is 'betwixt'                                        |
| . tip                  | Is true [1] when the particle is located at the tip of one of the poles of the parent particle |
| <b>CONTACT</b> [count] |                                                                                                |
| . active               | The number of accepted cells in contact with the particle                                      |
| . morphologyX          | The number of cells matching the morphology X in contact with the particle                     |
| . total                | The total number of cells (accepted and refused) in contact with the particle                  |
| <b>TYPE</b>            |                                                                                                |
| . color                | The color of the associated type                                                               |
| . index                | The index of the associated type                                                               |
| . title                | The title of the associated type                                                               |
| <b>DISTANCE</b> [mean] |                                                                                                |
| . mean                 | The average distance between the particle and the surrounding particles                        |
| . stdev                | The standard deviation of the distances between the particle and the surrounding particles     |
| . count                | The number of surrounding particles                                                            |
| <b>CLUMP</b>           | The finite number of portion of a specified area inside the particle.                          |
| <b>GAUSSIAN</b> [fit]  |                                                                                                |
| . a                    | The amplitude of the peak                                                                      |
| . b                    | The offset of the peak                                                                         |
| . d                    | The standard deviation of the peak                                                             |
| . x                    | The x-position of the center of the peak                                                       |
| . y                    | The y-position of the center of the peak                                                       |
| . fit                  | Is true [1] when the amplitude is greater than the specified threshold                         |
